# Supplementary material
Source: publisher site journal article supplement (https://www.dovepress.com/article/268055)

**Supplement Figure.** Protein expression levels of KCNH3 in different OC cells were detected by western blot.


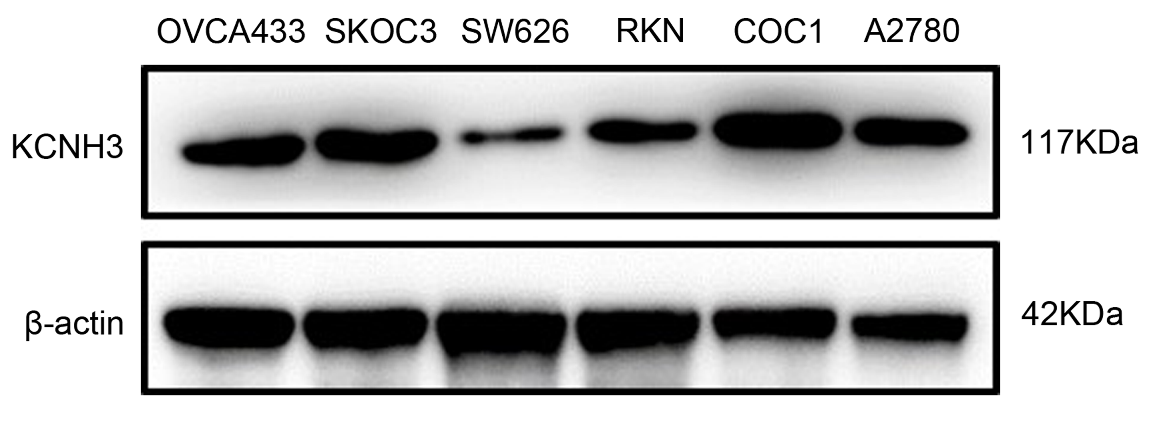

Supplement: Supplementary file 1 [file get_supplementary_file.php]
